# Supplementary material
Source: Atypon-hosted journal article supplement (doi:10.1287/moor.2024.0627)
Supplement: moor.2024.0627.sm1.pdf [file moor.2024.0627.sm1.pdf]

## Online Companion (Appendix)

This online companion is organized as follows. Section A extends the algorithmic framework to the context of barrier option pricing, Section B collects details of the numerical experiments, and Section C provides details of Remark 8.

### Appendix A: Barrier Option Pricing

**A.1. Problem Setting** This section considers the estimation of probabilities  $P(A_n)$  with  $A_n = \{\bar{X}_n \in A\}$  and

$$A \stackrel{\text{def}}{=} \{\xi \in \mathbb{D} : \xi(1) \leq -b, \sup_{t \leq 1} \xi(t) + ct \geq a\},$$

which corresponds to rare-event simulation in the context of down-and-in option. Here, we assume that  $a, b > 0$  and  $c < a$ . We consider the two-sided case in Assumption 1. That is,  $X(t)$  is a centered Lévy process with Lévy measures  $\nu$ , and there exists some  $\alpha, \alpha' > 1$  such that  $\nu[x, \infty) \in \mathcal{RV}_{-\alpha}(x)$  and  $\nu(-\infty, -x] \in \mathcal{RV}_{-\alpha'}(x)$  as  $x \rightarrow \infty$ . Also, we impose an alternative version of Assumption 2 throughout. Let  $X^{(-z, z)}(t)$  be the Lévy process with with generating triplet  $(c_X, \sigma, \nu|_{(-z, z)})$ . That is,  $X^{(-z, z)}(t)$  is a modulated version of  $X$  where all jumps with size larger than  $z$  are removed.

ASSUMPTION 4. *There exist  $z_0, C, \lambda > 0$  such that*

$$\mathbf{P}(X^{(-z, z)}(t) \in [x, x + \delta]) \leq \frac{C\delta}{t^\lambda \wedge 1} \quad \forall z \geq z_0, t > 0, x \in \mathbb{R}, \delta > 0.$$

**A.2. Importance Sampling Algorithm** Below, we present the design of the importance sampling algorithm. For any  $\xi \in \mathbb{D}$  and  $t \in (0, 1]$ , let  $\Delta\xi(t) = \xi(t) - \xi(t-)$  be the discontinuity in  $\xi$  at time  $t$ , and we set  $\Delta\xi(0) \equiv 0$ . Let

$$B^\gamma = \left\{ \xi \in \mathbb{D} : \#\{t \in [0, 1] : \Delta\xi(t) \geq \gamma\} \geq 1, \#\{t \in [0, 1] : \Delta\xi(t) \leq -\gamma\} \geq 1 \right\}$$

and let  $B_n^\gamma = \{\bar{X}_n \in B_n^\gamma\}$ . Intuitively speaking, on event  $B_n^\gamma$  there is at least one upward and one downward “large” jump in  $\bar{X}_n$ , where  $\gamma > 0$  is understood as the threshold for jump sizes to be considered “large”.

Fix some  $w \in (0, 1)$ , and let

$$\mathbf{Q}_n(\cdot) = w\mathbf{P}(\cdot) + (1 - w)\mathbf{P}(\cdot | B_n^\gamma).$$

The algorithm samples

$$L_n = Z_n \frac{d\mathbf{P}}{d\mathbf{Q}_n} = \frac{Z_n}{w + \frac{1-w}{\mathbf{P}(B_n^\gamma)} \mathbf{I}_{B_n^\gamma}}$$

under  $\mathbf{Q}_n$ . Now, we discuss the design of  $Z_n$  to ensure the strong efficiency of  $L_n$ . Analogous to the decomposition in (18), let

$$J_n(t) = \sum_{s \in [0, t]} \Delta X(s) \mathbf{I}(|\Delta X(s)| \geq n\gamma),$$

$$\Xi_n(t) = X(t) - J_n(t) = X(t) - \sum_{s \in [0, t]} \Delta X(s) \mathbf{I}(|\Delta X(s)| \geq n\gamma).$$

Let  $\bar{J}_n(t) = \frac{1}{n} J_n(nt)$ ,  $\bar{J}_n = \{\bar{J}_n(t) : t \in [0, 1]\}$ ,  $\bar{\Xi}_n(t) = \frac{1}{n} \Xi_n(nt)$ , and  $\bar{\Xi}_n = \{\bar{\Xi}_n(t) : t \in [0, 1]\}$ . Meanwhile, set

$$M_c(t) \stackrel{\text{def}}{=} \sup_{s \leq t} X(s) + cs, \quad Y_{n;c}^* \stackrel{\text{def}}{=} \mathbf{I}(M_c(n) \geq na, X(n) \leq -nb),$$

We have  $\mathbf{I}_{A_n} = Y_{n;c}^*$ . Under the convention  $\hat{Y}_n^{-1} \equiv 0$ , consider estimators  $Z_n$  of form

$$Z_n = \sum_{m=0}^{\tau} \frac{\hat{Y}_{n;c}^m - \hat{Y}_{n;c}^{m-1}}{\mathbf{P}(\tau \geq m)} \quad (81)$$

where  $\tau$  is  $\text{Geom}(\rho)$  for some  $\rho \in (0, 1)$  and is independent of everything else. Analogous to Proposition 1, the following result provides sufficient conditions on  $\hat{Y}_{n;c}^m$  for  $L_n$  to attain strong efficiency.

**PROPOSITION 4.** *Let  $C_0 > 0$ ,  $\rho_0 \in (0, 1)$ ,  $\mu > \alpha + \alpha' - 2$ , and  $\bar{m} \in \mathbb{N}$ . Suppose that*

$$\mathbf{P}\left(Y_{n;c}^* \neq \hat{Y}_{n;c}^m \mid \mathcal{D}^+(\bar{J}_n) = k, \mathcal{D}^-(\bar{J}_n) = k'\right) \leq C_0 \rho_0^m \cdot (k + k' + 1) \quad \forall k, k' \geq 0, n \geq 1, m \geq \bar{m} \quad (82)$$

where  $\mathcal{D}^+(\xi)$  and  $\mathcal{D}^-(\xi)$  count the number of discontinuities of positive and negative sizes in  $\xi$ , respectively. Besides, suppose that for all  $\Delta \in (0, 1)$ ,

$$\mathbf{P}\left(Y_{n;c}^* \neq \hat{Y}_{n;c}^m, \bar{X}_n \notin A^\Delta \mid \mathcal{D}^+(\bar{J}_n) = 0 \text{ or } \mathcal{D}^-(\bar{J}_n) = 0\right) \leq \frac{C_0 \rho_0^m}{\Delta^2 n^\mu} \quad \forall n \geq 1, m \geq 0 \quad (83)$$

where  $A^\Delta = \{\xi \in \mathbb{D} : \sup_{t \in [0, 1]} \xi(t) + ct \geq a - \Delta, \xi(1) \leq -b\}$ . Then given  $\rho \in (\rho_0, 1)$ , there exists some  $\bar{\gamma} = \bar{\gamma}(\rho) \in (0, b)$  such that for all  $\gamma \in (0, \bar{\gamma})$ , the estimators  $(L_n)_{n \geq 1}$  are **unbiased and strongly efficient** for  $\mathbf{P}(A_n) = \mathbf{P}(\bar{X}_n \in A)$  under the importance sampling distribution  $\mathbf{Q}_n$ .

The proof is almost identical to that of Proposition 1. In particular, the proof requires that

$$\mathbf{P}(A_n) = \mathcal{O}(nv[n, \infty) \cdot nv(-\infty, -n])$$

and that, for any  $\beta > 0$ , it holds for all  $\gamma$  small enough that

$$\mathbf{P}(A_n^\Delta \setminus B_n^\gamma) = o(n^\beta)$$

where  $A_n^\Delta = \{\bar{X}_n \in A^\Delta\}$ . These can be obtained directly using sample path large deviations for heavy-tailed Lévy processes in Result 2. The Proposition 4 is then established by repeating the arguments in Proposition 1 using Result 4 for the debiased multilevel Monte Carlo technique.

**A.3. Construction of  $\hat{Y}_{n;c}^m$**  Next, we describe the construction of  $\hat{Y}_{n;c}^m$  that can satisfy the conditions in Proposition 4. Specifically, we consider the case where ARA is involved. Let

$$\Xi_{n;c}(t) \stackrel{\text{def}}{=} \Xi_n(t) + ct.$$

Under both  $\mathbf{P}$  and  $\mathbf{Q}_n$ ,  $\Xi_{n;c}(t)$  admits the law of a Lévy process with generating triplet  $(c_X + c, \sigma, \nu|_{(-n\gamma, n\gamma)})$ . This leads to the Lévy-Ito decomposition

$$\begin{aligned} \Xi_{n;c}(t) &\stackrel{\text{d}}{=} (c_X + c)t + \sigma B(t) + \underbrace{\sum_{s \leq t} \Delta X(s) \mathbf{I}(\Delta X(s) \in (-n\gamma, -1] \cup [1, n\gamma))}_{\stackrel{\text{def}}{=} J_{n,-1}(t)} \\ &+ \sum_{m \geq 0} \left[ \underbrace{\sum_{s \leq t} \Delta X(s) \mathbf{I}(|\Delta X(s)| \in [\kappa_{n,m}, \kappa_{n,m-1})) - t \cdot \nu((-\kappa_{n,m-1}, -\kappa_{n,m}) \cup [\kappa_{n,m}, \kappa_{n,m-1}))}_{\stackrel{\text{def}}{=} J_{n,m}(t)} \right] \end{aligned}$$

with  $\kappa_{n,m}$  defined in (32). Besides, let  $\bar{\sigma}^2(\cdot)$  be defined as in (34). For each  $n \geq 1$  and  $m \geq 0$ , consider the approximation

$$\check{\Xi}_{n;c}^m(t) \stackrel{\text{def}}{=} (c_X + c)t + \sigma B(t) + \sum_{q=-1}^m J_{n,q}(t) + \sum_{q \geq m+1} \sqrt{\bar{\sigma}^2(\kappa_{n,q-1}) - \bar{\sigma}^2(\kappa_{n,q})} \cdot W^q(t)$$

where  $(W^m)_{m \geq 1}$  is a sequence of iid copies of standard Brownian motions independent of everything else.

Next, we discuss how to apply SBA and construct approximators  $\hat{Y}_{n;c}^m$ 's in (81). Let  $\zeta_k(t) = \sum_{i=1}^k z_i \mathbf{I}_{[u_i, n]}(t)$  be a piece-wise step function with  $k$  jumps over  $(0, n]$ , where  $0 < u_1 < u_2 < \dots < u_k \leq n$ , and  $z_i \neq 0$  for each  $i \in [k]$ . Recall

that the jump times in  $\zeta_k$  leads to a partition of  $[0, n]$  of  $(I_i)_{i \in [k+1]}$  defined in (24). For any  $I_i$ , let the sequence  $l_j^{(i)}$ 's be defined as in (27)–(28). Conditioning on  $(l_j^{(i)})_{j \geq 1}$ , one can then sample  $\xi_{j;c}^{(i),m}, \xi_{j;c}^{(i)}$  using

$$(\xi_{j;c}^{(i)}, \xi_{j;c}^{(i),0}, \xi_{j;c}^{(i),1}, \xi_{j;c}^{(i),2}, \dots) \stackrel{d}{=} (\Xi_{n;c}(l_j^{(i)}), \check{\Xi}_{n;c}^0(l_j^{(i)}), \check{\Xi}_{n;c}^1(l_j^{(i)}), \check{\Xi}_{n;c}^2(l_j^{(i)}), \dots).$$

The coupling in (10) then implies

$$\begin{aligned} & (\Xi_{n;c}(u_i) - \Xi_{n;c}(u_{i-1}), \sup_{t \in I_i} \Xi_{n;c}(t) - \Xi_{n;c}(u_{i-1}), \check{\Xi}_{n;c}^0(u_i) - \check{\Xi}_{n;c}^0(u_{i-1}), \sup_{t \in I_i} \check{\Xi}_{n;c}^0(t) - \check{\Xi}_{n;c}^0(u_{i-1}), \\ & \quad \check{\Xi}_{n;c}^1(u_i) - \check{\Xi}_{n;c}^1(u_{i-1}), \sup_{t \in I_i} \check{\Xi}_{n;c}^1(t) - \check{\Xi}_{n;c}^1(u_{i-1}), \dots) \\ & \stackrel{d}{=} \left( \sum_{j \geq 1} \xi_{j;c}^{(i)}, \sum_{j \geq 1} (\xi_{j;c}^{(i)})^+, \sum_{j \geq 1} \xi_{j;c}^{(i),0}, \sum_{j \geq 1} (\xi_{j;c}^{(i),0})^+, \sum_{j \geq 1} \xi_{j;c}^{(i),1}, \sum_{j \geq 1} (\xi_{j;c}^{(i),1})^+, \dots \right). \end{aligned}$$

Now, we define

$$\hat{M}_{n;c}^{(i),m}(\zeta_k) = \sum_{j=1}^{m + \lceil \log_2(n^d) \rceil} (\xi_{j;c}^{(i),m})^+$$

as an approximation to  $M_{n;c}^{(i),*}(\zeta_k) = \sup_{t \in I_i} \Xi_{n;c}(t) - \Xi_{n;c}(u_{i-1}) = \sum_{j \geq 1} (\xi_{j;c}^{(i)})^+$ . Now, set

$$\hat{Y}_{n;c}^m(\zeta_k) = \left[ \max_{i \in [k+1]} \mathbf{I} \left( \sum_{q=1}^{i-1} \sum_{j \geq 0} \xi_{j;c}^{(q),m} + \sum_{q=1}^{i-1} z_q + \hat{M}_{n;c}^{(i),m}(\zeta_k) \geq na \right) \right] \cdot \mathbf{I} \left( \sum_{q=1}^{k+1} \sum_{j \geq 0} \xi_{j;c}^{(q),m} + \sum_{q=1}^k z_q - cn \leq -nb \right).$$

In (81), we plug in  $\hat{Y}_{n;c}^m = \hat{Y}_{n;c}^m(J_n)$ .

The proof of the strong efficiency is almost identical to that of Theorem 2. The only major difference is that in Lemma 7, we apply Assumption 4 instead of Assumption 2.

**Appendix B: Details of Numerical Experiments** This section provides the numerical details for the experiment results shown in Figures 1 and 2.

**Appendix C: Details of Remark 8: Biased estimators with Prescribed Relative Accuracy** While this paper focuses on achieving *unbiasedness* using the debiased multilevel Monte Carlo estimators  $Z_n$  (20), here we touch upon a different perspective that can be viewed as an analogous of strong efficiency for biased Monte Carlo estimators: we

TABLE 1. Relative errors in Figure 1: Algorithm 2 (first row) versus crude Monte Carlo (second row). Underline: crude MC with early termination (threshold: 24 hours); numbers estimated by the corresponding IS results

| $n$             | 100    | 200    | 300    | 400           | 500            | 600            | 700            | 800            | 900            | 1000           |
|-----------------|--------|--------|--------|---------------|----------------|----------------|----------------|----------------|----------------|----------------|
| $\alpha = 1.45$ | 10.00  | 11.91  | 12.69  | 12.99         | 13.52          | 14.38          | 15.49          | 14.92          | 15.31          | 16.30          |
|                 | 66.90  | 103.51 | 135.01 | 156.87        | 170.26         | 205.83         | 219.65         | 242.41         | 254.37         | 273.86         |
| $\alpha = 1.6$  | 13.33  | 15.48  | 15.78  | 17.63         | 19.09          | 19.78          | 21.73          | 19.53          | 19.62          | 20.54          |
|                 | 131.33 | 237.31 | 309.35 | 431.55        | 461.54         | <u>498.28</u>  | <u>652.77</u>  | <u>705.62</u>  | <u>755.92</u>  | <u>804.06</u>  |
| $\alpha = 1.75$ | 16.48  | 18.66  | 22.77  | 22.92         | 23.24          | 24.79          | 25.44          | 25.73          | 28.59          | 26.89          |
|                 | 276.25 | 530.92 | 767.48 | <u>896.33</u> | <u>1278.52</u> | <u>1419.70</u> | <u>1635.84</u> | <u>1860.28</u> | <u>2029.07</u> | <u>2193.27</u> |

TABLE 2. Runtime (sec) in Figure 1: Algorithm 2 (first row) versus crude Monte Carlo (second row). Underline: crude MC with early termination (threshold: 24 hours); numbers estimated by the corresponding IS results.

| $n$             | 100      | 200      | 300      | 400             | 500             | 600             | 700             | 800             | 900             | 1000            |
|-----------------|----------|----------|----------|-----------------|-----------------|-----------------|-----------------|-----------------|-----------------|-----------------|
| $\alpha = 1.45$ | 20.48    | 26.72    | 40.21    | 44.92           | 45.24           | 55.84           | 73.87           | 49.42           | 72.51           | 86.81           |
|                 | 2.75e+02 | 1.21e+03 | 2.96e+03 | 5.50e+03        | 8.70e+03        | 1.30e+04        | 1.79e+04        | 2.54e+04        | 3.29e+04        | 3.97e+04        |
| $\alpha = 1.6$  | 40.44    | 72.08    | 70.67    | 87.55           | 144.28          | 88.8            | 131.62          | 137.37          | 144.67          | 148.8           |
|                 | 1.12e+03 | 6.13e+03 | 1.73e+04 | 3.49e+04        | 6.67e+04        | <u>8.17e+04</u> | <u>1.63e+05</u> | <u>2.22e+05</u> | <u>2.85e+05</u> | <u>3.49e+05</u> |
| $\alpha = 1.75$ | 65.08    | 106.37   | 105.08   | 110.66          | 174.43          | 173.06          | 191.4           | 213.72          | 221.63          | 229.39          |
|                 | 4.02e+03 | 3.37e+04 | 8.64e+04 | <u>1.76e+05</u> | <u>4.50e+05</u> | <u>6.63e+05</u> | <u>1.02e+06</u> | <u>1.54e+06</u> | <u>2.06e+06</u> | <u>2.60e+06</u> |

TABLE 3. Relative errors in Figure 2: Algorithm 3 (first row) versus crude Monte Carlo (second row). Underline: crude MC with early termination (threshold: 24 hours); numbers estimated by the corresponding IS results.

| $n$             | 100           | 200           | 300           | 400           | 500            |
|-----------------|---------------|---------------|---------------|---------------|----------------|
| $\alpha = 1.45$ | 9.64          | 12.21         | 12.0          | 13.68         | 14.74          |
|                 | 60.5          | 104.39        | 129.9         | 153.77        | 193.81         |
| $\alpha = 1.6$  | 13.23         | 14.11         | 16.61         | 15.78         | 17.81          |
|                 | 134.67        | <u>214.77</u> | <u>356.19</u> | <u>309.39</u> | <u>599.62</u>  |
| $\alpha = 1.75$ | 16.27         | 19.92         | 22.53         | 21.58         | 23.82          |
|                 | <u>229.17</u> | <u>517.39</u> | <u>610.4</u>  | <u>899.18</u> | <u>1162.56</u> |

TABLE 4. Runtime (sec) in Figure 2: Algorithm 3 (first row) versus crude Monte Carlo (second row). Underline: crude MC with early termination (threshold: 24 hours); numbers estimated by the corresponding IS results.

| $n$             | 100             | 200             | 300             | 400             | 500             |
|-----------------|-----------------|-----------------|-----------------|-----------------|-----------------|
| $\alpha = 1.45$ | 4.43e+03        | 5.02e+03        | 9.85e+03        | 7.44e+03        | 8.32e+03        |
|                 | 9.78e+03        | 2.09e+04        | 4.73e+04        | 5.19e+04        | 7.32e+04        |
| $\alpha = 1.6$  | 7.63e+03        | 8.99e+03        | 1.69e+04        | 9.48e+03        | 2.67e+04        |
|                 | 3.76e+04        | <u>1.14e+05</u> | <u>3.18e+05</u> | <u>2.47e+05</u> | <u>8.98e+05</u> |
| $\alpha = 1.75$ | 9.97e+03        | 1.91e+04        | 1.56e+04        | 2.16e+04        | 2.69e+04        |
|                 | <u>1.25e+05</u> | <u>6.6e+05</u>  | <u>9.33e+05</u> | <u>2.09e+06</u> | <u>3.38e+06</u> |

discuss the cost of achieving a prescribed level of relative accuracy using the biased estimators  $\hat{Y}_n^m \cdot \mathbf{I}_{E_n}$  in (31) or (39) (still generated under the importance sampling distributions  $\mathbf{Q}_n$ ). For concreteness of our discussion, we specialize the criterion of *fully polynomial randomized approximation scheme* (FPRAS) (see, e.g., Definition 2.2 of Adler et al. (2012)) to our setting, and say that a Monte Carlo procedure is FPRAS if there exist  $q, q_1, q_2 \in [0, \infty)$  such that, for estimating any  $\mathbf{P}(A_n)$ , the procedure outputs an estimator that is guaranteed to have at most  $\epsilon > 0$  relative error with confidence at least  $1 - \delta \in (0, 1)$ , under computational costs of order  $\mathbf{O}(\epsilon^{-q_1} \delta^{-q_2} |\log \mathbf{P}(A_n)|^q)$ .

- **Non-ARA case (i.e., with exact simulation for marginal distributions of  $X^{<n\gamma}(t)$ ).** We start by considering the cost of generating  $\hat{Y}_n^m(\zeta_k)$  in (31) given a step function  $\zeta_k = \sum_{i=1}^k z_i \mathbf{I}_{[u_i, n]}$ . By (30), the cost of generating  $(\hat{M}_n^{(i),m}(\zeta_k))_{i \in [k+1]}$  is  $(k+1) \cdot \mathbf{O}(m + \log n)$ . Meanwhile, because  $\sum_{j \geq 0} \xi_j^{(q)} \stackrel{d}{=} X^{<n\gamma}(u_q - u_{q-1})$  and generating (31) requires us to sample  $\sum_{j \geq 0} \xi_j^{(q)}$  for all  $q \in [k+1]$ , the related computational cost is  $(k+1)$ . Next, repeating the calculations in (52), we see that unconditionally (i.e., when considering the randomness of sampling the big jump process  $\zeta_k$  under  $\mathbf{Q}_n$ ), the (expected) computational cost of generating  $\hat{Y}_n^m$  is  $\mathbf{O}(m + \log n)$ . On the other hand, by the last inequality in (52), we know the existence of some  $\rho_0 \in (0, 1)$  such that (recall that  $Y_n^*$  and  $\hat{Y}_n^m$  are indicator functions)

$$|\mathbf{E}^{\mathbf{Q}_n}[\hat{Y}_n^m \mathbf{I}_{E_n}] - \mathbf{P}(A_n)| = |\mathbf{E}^{\mathbf{Q}_n}[\hat{Y}_n^m \mathbf{I}_{E_n}] - \mathbf{E}^{\mathbf{Q}_n}[Y_n^* \mathbf{I}_{E_n}]| \leq \mathbf{E}^{\mathbf{Q}_n}|\hat{Y}_n^m - Y_n^*| \leq \frac{1}{w} \mathbf{P}(\hat{Y}_n^m \neq Y_n^*) = \mathbf{O}(\rho_0^m) \quad (84)$$

holds for all  $m, n$ , where  $w \in (0, 1)$  is the fixed constant in the design of IS distribution  $\mathbf{Q}_n$  in (16). Also, by the large deviations results in Section 2.2, we have  $\mathbf{P}(A_n) = \Theta(n^{-l^* \cdot (\alpha-1)} L(n))$  where  $L(n)$  is some slowly varying function,  $\alpha \in (1, \infty)$  is the heavy-tailed index for the increments in  $X(t)$ , and  $l^*$  is defined in (16). Then, to ensure

that  $|\mathbf{E}^{\mathbf{Q}_n}[\hat{Y}_n^m] - \mathbf{P}(A_n)| \leq \epsilon \mathbf{P}(A_n)$ , one can pick  $m = \Theta((|\log \epsilon| + |\log \mathbf{P}(A_n)|)/\log \rho_0) = \Theta(|\log \epsilon| + \log n)$ .

Under such  $m$ , the cost of generating one copy of  $\hat{Y}_n^m \mathbf{I}_{E_n}$  is  $\mathcal{O}(m + \log n) = \mathcal{O}(|\log \epsilon| + \log n)$ . Furthermore, the proof of Proposition 1 in Section 6.1 essentially confirms that  $\sup_n \text{var}^{\mathbf{Q}_n}(\hat{Y}_n^m \mathbf{I}_{E_n}) / (\mathbf{P}(A_n))^2 < \infty$  under the choice of  $m = \Theta(|\log \epsilon| + \log n)$ . Then, by repeating the derivation prior to Definition 2.2 of Adler et al. (2012) (which boils down to an application of Chebyshev's inequality), an error smaller than  $\epsilon \mathbf{P}(A_n)$  can be ensured with confidence at least  $1 - \delta$  by averaging  $R$  iid samples of  $\hat{Y}_n^m \mathbf{I}_{E_n}$ , where  $R = \Theta(\epsilon^{-2} \delta^{-1})$ . In other words, such an averaged estimator is FPRAS for  $\mathbf{P}(A_n)$  with a computational cost  $R \cdot \mathcal{O}(|\log \epsilon| + \log n) = \mathcal{O}(\epsilon^{-2} \delta^{-1} \log n) = \mathcal{O}(\epsilon^{-2} \delta^{-1} |\log \mathbf{P}(A_n)|)$ .

- Practical Challenges when Implementing FPRAS Estimators.** While the order of  $m$  and  $R$  (w.r.t.  $n$ ) is clear from the discussion above, determining the exact value of  $m$  (and hence the implementation of the FPRAS estimators) can be challenging in practice, as it involves instance-specific quantities that can be hard to estimate. For instance, determining the exact value of the sample size  $R$  requires the knowledge of  $\sup_n \text{var}^{\mathbf{Q}_n}(\hat{Y}_n^m \mathbf{I}_{E_n}) / (\mathbf{P}(A_n))^2 < \infty$ , which is hard to estimate even for a fixed  $n$ : in particular, note that the estimation for the denominator  $\mathbf{P}(A_n)$  is hard to justify unless we resort to unbiased estimators proposed in the main paper, which then defeats the purposes of identifying (biased but) FPRAS estimators. Besides, determining  $m$  relies on the knowledge of the leading coefficient for the  $\mathcal{O}(\rho_0^m)$  term in (84), which further requires knowing the exact value of the constant  $C$  in Assumption 2 (see, e.g., the proof of Propositions 2 and 3). However, Assumption 2 and the sufficient conditions stated in Section 4 are only able to confirm the existence of such  $C$ .
- ARA case.** Next, we consider the case where the exact simulation of  $X^{<n\gamma}(t)$  is not available, and we resort to ARA for approximating the small-jump martingales in the underlying Lévy process with infinite activities (as in our Algorithm 3). That is, by  $\hat{Y}_n^m(\zeta_k)$  we refer to the construction in (39), where the truncation threshold for ARA is set as  $\kappa^m/n^r$  for some fixed  $r > 0$ . As noted above, our proofs in Section 6 simultaneously address the non-ARA and ARA cases. Therefore, many of the bounds stated in the previous bullet point still apply to the ARA case. In particular, we still have: (i)  $|\mathbf{E}^{\mathbf{Q}_n}[\hat{Y}_n^m \mathbf{I}_{E_n}] - \mathbf{P}(A_n)| \leq \epsilon \mathbf{P}(A_n)$  and  $\sup_n \text{var}^{\mathbf{Q}_n}(\hat{Y}_n^m \mathbf{I}_{E_n}) / (\mathbf{P}(A_n))^2 < \infty$  under the choice of  $m = \Theta(|\log \epsilon| + \log n)$  (more precisely, suppose that for some fixed and large enough  $C \in (0, \infty)$ , the choice of  $m = C(|\log \epsilon| + \log n)$  would suffice); and (ii) an error smaller than  $\epsilon \mathbf{P}(A_n)$  can be ensured with confidence at least  $1 - \delta$  by averaging  $R = \Theta(\epsilon^{-2} \delta^{-1})$  iid samples of such  $\hat{Y}_n^m \mathbf{I}_{E_n}$ . However, due to the incorporation of ARA, the computational cost is now dominated by the efforts of generating all jumps in  $X(t)$

above the level of  $\kappa^m/n^r$ . Analogous to the computations in Remark 7, we see that the computational cost of generating  $\hat{Y}_n^m$ , with ARA incorporated, is of order  $\mathbf{O}(n \cdot (\kappa^m/n^r)^{-\beta_-}) = \mathbf{O}(n \cdot (\kappa^m/n^r)^{-\beta_+})$  for any  $\beta_+ \in (\beta, 2)$ ,  $\beta_- \in (0, \beta)$ , where  $\beta \in (0, 2)$  is the Blumenthal-Gettoor index in Assumption 1. Then, the total cost of achieving  $\epsilon$  relative error with confidence  $1 - \delta$  is

$$\begin{aligned} R \cdot \mathbf{O}\left(n^{1+r\beta_+} \cdot \kappa^{-\beta_+ \cdot C(|\log \epsilon| + \log n)}\right) &= \mathbf{O}\left(\epsilon^{-2} \delta^{-1} \cdot n^{1+r\beta_+} \cdot \kappa^{-\beta_+ \cdot C(|\log \epsilon| + \log n)}\right) \\ &= \mathbf{O}\left(\epsilon^{-2-C\beta_+|\log \kappa|} \cdot \delta^{-1} \cdot n^{1+r\beta_++C\beta_+|\log \kappa|}\right). \end{aligned} \quad (85)$$

- Therefore, the FPRAS criterion is *not satisfied* in the ARA case. In particular, Adler et al. (2012) focuses on light-tailed cases where the counterparts of our term  $\log \mathbf{P}(A_n)$  scale polynomially w.r.t.  $n$ . In contrast, our heavy-tailed setting dictates that  $\log \mathbf{P}(A_n)$  scales logarithmically w.r.t.  $n$ ; this results in an  $\mathbf{O}(\epsilon^{-q_1} \delta^{-q_2} |\log \mathbf{P}(A_n)|^q) = \mathbf{O}(\epsilon^{-q_1} \delta^{-q_2} \cdot (\log n)^q)$  bound on the computational cost in the definition of the fully polynomial randomized approximation scheme that, despite its name, is not even polynomial in  $n$ . Indeed, by comparing with (85), we see that this criterion is indeed too stringent when ARA is needed for the simulation of the underlying Lévy process.

**Appendix D: Proof for Technical Lemmas in Section 6.2** This section collects the proof for technical Lemmas in Section 6.2. First, we review a useful result regarding the Lévy measure.

**Result 5 (Lemma 1 of González Cázares et al. (2022))** Let  $\nu$  be the Lévy measure of a Lévy process  $X$ . Let  $I_0^p(\nu) \stackrel{\text{def}}{=} \int_{(-1,1)} |x|^p \nu(dx)$ . Suppose that  $\beta < 2$  for the Blumenthal-Gettoor index  $\beta \stackrel{\text{def}}{=} \inf\{p > 0 : I_0^p(\nu) < \infty\}$ . Then

$$\int_{(-\kappa, \kappa)} x^2 \nu(dx) \leq \kappa^{2-\beta_+} I_0^{\beta_+}(\nu) \quad \forall \kappa \in (0, 1], \beta_+ \in (\beta, 2).$$

Next, we provide the proof of Lemmas 3–7.

*Proof of Lemma 3* Recall that the generating triplet of  $X$  is  $(c_X, \sigma, \nu)$  and for the Blumenthal-Gettoor index  $\beta \stackrel{\text{def}}{=} \inf\{p > 0 : \int_{(-1,1)} |x|^p \nu(dx) < \infty\}$  we have  $\beta < 2$ ; see Assumption 1. Fix some  $\beta_+ \in (1 \vee \beta, 2)$  in this proof. We prove the lemma for  $C_X \stackrel{\text{def}}{=} \max\left\{|\sigma| \sqrt{\frac{2}{\pi}} + 2\sqrt{I_0^{\beta_+}(\nu)}, (c_X)^+ + I_+^1(\nu) + 2I_0^{\beta_+}(\nu)\right\}$ , where  $(x)^+ = x \vee 0$ ,  $I_+^1(\nu) = \int_{[1, \infty)} x \nu(dx)$ , and  $I_0^p(\nu) = \int_{(-1,1)} |x|^p \nu(dx)$ .

Recall that  $\Xi_n$  is a Lévy process with generating triplet  $(c_X, \sigma, \nu|_{(-\infty, n\gamma)})$ . Let  $\nu_n \stackrel{\text{def}}{=} \nu|_{(-\infty, n\gamma)}$ . It follows from Lemma 2 of González Cázares et al. (2022) (specifically, by setting  $t = T$  in equation (26)) that, for all  $t > 0$  and  $n \geq 1$ ,

$$\mathbf{E} \sup_{s \in [0, t]} \Xi_n(t) \leq \left(|\sigma| \sqrt{\frac{2}{\pi}} + 2\sqrt{I_0^{\beta_+}(\nu_n)}\right) \sqrt{t} + \left((c_X)^+ + I_+^1(\nu_n) + 2I_0^{\beta_+}(\nu_n)\right) t. \quad (86)$$

Note that  $I_0^{\beta_+}(\nu_n) = \int_{(-1,1)} |x|^{\beta_+} \nu_n(dx) = \int_{(-1,1) \cap (-\infty, n\gamma)} |x|^{\beta_+} \nu(dx) \leq I_0^{\beta_+}(\nu)$  and  $I_+^1(\nu_n) = \int_{[1,\infty)} x \nu_n(dx) = \int_{[1,\infty) \cap (-\infty, n\gamma)} x \nu(dx) \leq I_+^1(\nu)$ . Plugging these two bounds into (86), we conclude the proof.  $\square$

*Proof of Lemma 4* From the definitions of  $\Xi_n$  and  $\check{\Xi}_n^m$  in (33) and (35), respectively, we have  $\Xi_n(t) - \check{\Xi}_n^m(t) \stackrel{d}{=} X^{(-\kappa_{n,m}, \kappa_{n,m})}(t) - \bar{\sigma}(\kappa_{n,m})B(t)$ , where  $X^{(-c,c)}$  is the Lévy process with generating triplet  $(0, 0, \nu|_{(-c,c)})$ ,  $\kappa_{n,m} = \kappa^m/n^r$ , and  $B$  is a standard Brownian motion independent of  $X^{(-\kappa_{n,m}, \kappa_{n,m})}$ . In particular,  $X^{(-\kappa_{n,m}, \kappa_{n,m})}$  is a martingale with variance  $\text{var}[X^{(-\kappa_{n,m}, \kappa_{n,m})}(1)] = \bar{\sigma}^2(\kappa_{n,m})$ ; see (34) for the definition of  $\bar{\sigma}^2(\cdot)$ . Therefore,

$$\begin{aligned} & \mathbf{P}\left(\sup_{t \in [0, n]} \left| \Xi_n(t) - \check{\Xi}_n^m(t) \right| > x\right) \\ & \leq \frac{1}{x^2} \mathbf{E} \left| X^{(-\kappa_{n,m}, \kappa_{n,m})}(n) - \bar{\sigma}(\kappa_{n,m})B(n) \right|^2 \quad \text{using Doob's inequality} \\ & = \frac{2n}{x^2} \bar{\sigma}^2(\kappa_{n,m}) \quad \text{due to the independence between } X^{(-\kappa_{n,m}, \kappa_{n,m})} \text{ and } B \\ & \leq \frac{2n}{x^2} \cdot \kappa_{n,m}^{2-\beta_+} I_0^{\beta_+}(\nu) \quad \text{using Result 5} \\ & = \frac{2I_0^{\beta_+}(\nu)}{x^2} \cdot \frac{n\kappa^{m(2-\beta_+)}}{n^{r(2-\beta_+)}} = \frac{2I_0^{\beta_+}(\nu)}{x^2} \cdot \frac{\kappa^{m(2-\beta_+)}}{n^{r(2-\beta_+)-1}} \quad \text{due to } \kappa_{n,m} = \kappa^m/n^r. \end{aligned}$$

To conclude the proof, we set  $C = 2I_0^{\beta_+}(\nu) = 2 \int_{(-1,1)} |x|^{\beta_+} \nu(dx)$ .  $\square$

*Proof of Lemma 5* For notational simplicity, set  $k(n) = \lceil \log_2(n^d) \rceil$ . Due to  $|(x)^+ - (y)^+| \leq |x - y|$ ,

$$\begin{aligned} & \mathbf{P}\left(\left| \sum_{j=1}^{m+k(n)} (\xi_j^{[n]}(l))^+ - \sum_{j=1}^{m+k(n)} (\xi_j^{[n],m}(l))^+ \right| > y\right) \\ & \leq \mathbf{P}\left(\sum_{j=1}^{m+k(n)} \left| (\xi_j^{[n]}(l))^+ - (\xi_j^{[n],m}(l))^+ \right| > y\right) \leq \mathbf{P}\left(\sum_{j=1}^{m+k(n)} \underbrace{\left| \xi_j^{[n]}(l) - \xi_j^{[n],m}(l) \right|}_{\stackrel{\text{def}}{=} q_j} > y\right). \end{aligned} \quad (87)$$

Furthermore, we claim the existence of some constant  $\tilde{C} \in (0, \infty)$  such that (for any  $y, d > 0, l \in [0, n]$ , and any  $n \geq 1, m \in \mathbb{N}$ )

$$\mathbf{P}\left(\sum_{j=1}^{m+k(n)} |q_j| > y\right) \leq \tilde{C} \cdot \frac{n\bar{\sigma}^2(\kappa_{n,m})}{y^2}. \quad (88)$$

Then using Result 5, we yield

$$n\bar{\sigma}^2(\kappa_{n,m}) \leq n \cdot \kappa_{n,m}^{2-\beta_+} I_0^{\beta_+}(\nu) = \frac{\kappa^{m(2-\beta_+)}}{n^{r(2-\beta_+)-1}} \cdot I_0^{\beta_+}(\nu)$$

where  $I_0^{\beta^+}(\nu) = \int_{(-1,1)} |x|^{\beta^+} \nu(dx)$ . Setting  $C = \tilde{C} I_0^{\beta^+}(\nu)$ , we conclude the proof.

Now, it only remains to prove claim (88). Let  $\chi = 2^{1/4}$ . Note that  $1 = (\chi - 1) \sum_{j \geq 1} \frac{1}{\chi^j} \geq (\chi - 1) \left( \frac{1}{\chi} + \frac{1}{\chi^2} + \dots + \frac{1}{\chi^{m+k(n)}} \right)$ .

As a result,

$$\mathbf{P}\left(\sum_{j=1}^{k(n)+m} |q_j| > y\right) \leq \mathbf{P}\left(\sum_{j=1}^{k(n)+m} |q_j| > y(\chi - 1) \sum_{j=1}^{k(n)+m} \frac{1}{\chi^j}\right) \leq \sum_{j=1}^{k(n)+m} \mathbf{P}\left(|q_j| > y \cdot \frac{\chi - 1}{\chi^j}\right) \quad (89)$$

Next, we bound each  $\mathbf{P}\left(|q_j| > y \frac{\chi - 1}{\chi^j}\right)$ . Conditioning on  $l_j(l) = t$  (for any  $t \in [0, l]$ ), we get

$$\begin{aligned} \mathbf{P}\left(|q_j| > y \frac{\chi - 1}{\chi^j} \mid l_j(l) = t\right) &= \mathbf{P}\left(\left|\Xi_n(t) - \check{\Xi}_n^m(t)\right| > y \frac{\chi - 1}{\chi^j}\right) \quad \text{due to (75)} \\ &\leq \frac{\chi^{2j}}{y^2(\chi - 1)^2} \mathbf{E}\left|X^{(-\kappa_{n,m}, \kappa_{n,m})}(t) - \bar{\sigma}(\kappa_{n,m})B(t)\right|^2 \\ &= \frac{\chi^{2j}}{y^2(\chi - 1)^2} \cdot 2\bar{\sigma}^2(\kappa_{n,m})t \\ \implies \mathbf{P}\left(|q_j| > y \frac{\chi - 1}{\chi^j}\right) &\leq \frac{\chi^{2j}}{y^2(\chi - 1)^2} \cdot 2\bar{\sigma}^2(\kappa_{n,m}) \cdot \mathbf{E}[l_j(l)] \\ &= \frac{\sqrt{2^j}}{y^2(2^{1/4} - 1)^2} \cdot 2\bar{\sigma}^2(\kappa_{m,n}) \cdot \mathbf{E}[l_j(l)] \quad \text{due to } \chi = 2^{1/4} \\ &= \frac{\sqrt{2^j}}{y^2(2^{1/4} - 1)^2} \cdot 2\bar{\sigma}^2(\kappa_{m,n}) \cdot \frac{l}{2^j} \quad \text{by definition of } l_j(l) \text{ in (74)} \\ &\leq \frac{2}{(2^{1/4} - 1)^2 \sqrt{2^j}} \cdot \frac{n\bar{\sigma}^2(\kappa_{m,n})}{y^2} \quad \text{due to } l \leq n. \end{aligned}$$

Therefore, in (89), we get

$$\mathbf{P}\left(\sum_{j=1}^{k(n)+m} |q_j| > y\right) \leq \frac{n\bar{\sigma}^2(\kappa_{m,n})}{y^2} \sum_{j=1}^{k(n)+m} \frac{2}{(2^{1/4} - 1)^2 \sqrt{2^j}} = \frac{n\bar{\sigma}^2(\kappa_{m,n})}{y^2} \cdot \underbrace{\frac{2\sqrt{2}}{(2^{1/4} - 1)^2(\sqrt{2} - 1)}}_{\stackrel{\text{def}}{=} \tilde{C}},$$

thus establishing claim (88).  $\square$

*Proof of Lemma 6* For this proof, we adopt the notation  $\check{l}_k(l) \stackrel{\text{def}}{=} l - l_1(l) - l_2(l) - \dots - l_k(l)$  for the remaining stick length after the first  $k$  sticks. Conditioning on  $\check{l}_{m+\lceil \log_2(n^d) \rceil}(l) = t$ ,

$$\begin{aligned} \mathbf{P}\left(\sum_{j=m+\lceil \log_2(n^d) \rceil}^{[n]} (\xi_j^{[n]}(l))^+ > x \mid \check{l}_{m+\lceil \log_2(n^d) \rceil}(l) = t\right) &= \mathbf{P}\left(\sup_{s \in [0, t]} \Xi_n(s) > x\right) \quad \text{by Result 3} \\ &\leq \frac{C_X}{x}(\sqrt{t} + t) \quad \text{using Lemma 3.} \end{aligned}$$

Therefore, unconditionally,

$$\begin{aligned} \mathbf{P}\left(\sum_{j>m+\lceil\log_2(n^d)\rceil} (\xi_j^{[n]}(l))^+ > x\right) &\leq \frac{C_X}{x} \mathbf{E}\left[\sqrt{\check{l}_{m+\lceil\log_2(n^d)\rceil}(l)} + \mathbf{E}\check{l}_{m+\lceil\log_2(n^d)\rceil}(l)\right] \\ &\leq \frac{C_X}{x} \left[\sqrt{\mathbf{E}\check{l}_{m+\lceil\log_2(n^d)\rceil}(l)} + \mathbf{E}\check{l}_{m+\lceil\log_2(n^d)\rceil}(l)\right] \end{aligned}$$

The last line follows from Jensen's inequality. Lastly, by definition of  $l_j(l)$ 's in (74), we have

$$\mathbf{E}\check{l}_{m+\lceil\log_2(n^d)\rceil}(l) = \frac{l}{2^{m+\lceil\log_2(n^d)\rceil}} \leq \frac{l}{2^m \cdot n^d} \leq \frac{n}{2^m \cdot n^d} = \frac{1}{n^{d-1} \cdot 2^m} \quad \text{due to } l \in [0, n].$$

This concludes the proof.  $\square$

*Proof of Lemma 7* To simplify notations, in this proof we set  $k(n) = \lceil\log_2(n^d)\rceil$  and write  $l_j = l_j(l)$  when there is no ambiguity. For the sequence of random variables  $(l_1, \dots, l_{m+k(n)})$ , let  $\tilde{l}_1 \geq \tilde{l}_2 \geq \dots \geq \tilde{l}_{m+k(n)}$  be its order statistics. Given any ordered positive real sequence  $t_1 \geq t_2 \geq \dots \geq t_{m+k(n)} > 0$ , by conditioning on  $\tilde{l}_j = t_j \forall j \in [m+k(n)]$ , it follows from (75) that

$$\mathbf{P}\left(\sum_{j=1}^{m+k(n)} (\xi_j^{[n]}(l))^+ \in [y, y+c] \mid \tilde{l}_j = t_j \forall j \in [m+k(n)]\right) = \mathbf{P}\left(\sum_{j=1}^{m+k(n)} (\Xi_n^{(j)}(t_j))^+ \in [y, y+c]\right) \quad (90)$$

where  $\Xi_n^{(j)}$ 's are iid copies of the Lévy processes  $\Xi_n = X^{<n^\gamma}$ . Next, fix  $\eta = \delta^{m\alpha_3}/n^{\alpha_4}$ . Given the sequence of real numbers  $t_j$ 's, we define  $J \stackrel{\text{def}}{=} \#\{j \in [m+k(n)] : t_j > \eta\}$  as the number of elements in the sequence that are larger than  $\eta$ . In case that  $t_1 \leq \eta$ , we set  $J = 0$ . With  $J$  defined, we consider a decomposition of events in (90) based on the first  $j \in [m+k(n)]$  such that  $\Xi_n^{(j)}(t_j) > 0$  (and hence  $(\Xi_n^{(j)}(t_j))^+ > 0$ ), especially if such  $t_j$  is larger than  $\eta$  or not. To be specific,

$$\begin{aligned} &\mathbf{P}\left(\sum_{j=1}^{m+k(n)} (\Xi_n^{(j)}(t_j))^+ \in [y, y+c]\right) \\ &= \underbrace{\sum_{j=1}^J \mathbf{P}\left(\Xi_n^{(i)}(t_i) \leq 0 \forall i \in [j-1]; \Xi_n^{(j)}(t_j) > 0; \sum_{i=j}^{m+k(n)} (\Xi_n^{(i)}(t_i))^+ \in [y, y+c]\right)}_{\stackrel{\text{def}}{=} p_j} \\ &+ \underbrace{\mathbf{P}\left(\Xi_n^{(i)}(t_i) \leq 0 \forall i \in [J]; \sum_{j=J+1}^{m+k(n)} (\Xi_n^{(j)}(t_j))^+ \in [y, y+c]\right)}_{\stackrel{\text{def}}{=} p_*}. \end{aligned} \quad (91)$$

We first bound terms  $p_j$ 's. For any  $j \in [J]$ , observe that

$$\begin{aligned}
p_j &\leq \mathbf{P}\left(\Xi_n^{(j)}(t_j) > 0; \sum_{i=j}^{m+k(n)} (\Xi_n^{(i)}(t_i))^+ \in [y, y+c]\right) \\
&= \int_{\mathbb{R}} \mathbf{P}\left(\Xi_n^{(j)}(t_j) \in [y-x, y-x+c] \cap (0, \infty)\right) \mathbf{P}\left(\sum_{i=j+1}^{m+k(n)} (\Xi_n^{(i)}(t_i))^+ \in dx\right) \\
&\leq \frac{Cc}{t_j^\lambda \wedge 1} \quad \text{by Assumption 2} \\
&\leq \frac{Cn^{\alpha_4\lambda}}{\delta^{m\alpha_3\lambda}} \cdot c \quad \text{due to } j \leq J, \text{ and hence } t_j > \eta = \delta^{m\alpha_3}/n^{\alpha_4}.
\end{aligned} \tag{92}$$

On the other hand,

$$\begin{aligned}
p_* &\leq \mathbf{P}\left(\sum_{j=J+1}^{m+k(n)} (\Xi_n^{(j)}(t_j))^+ \in [y, y+c]\right) \leq \mathbf{P}\left(\sum_{j=J+1}^{m+k(n)} (\Xi_n^{(j)}(t_j))^+ \geq y_0\right) \quad \text{due to } y \geq y_0 > 0 \\
&\leq \sum_{j=J+1}^{m+k(n)} \mathbf{P}\left(\Xi_n^{(j)}(t_j) \geq y_0/N\right) \quad \text{with } N \stackrel{\text{def}}{=} m+k(n)-J \\
&\leq \sum_{j=J+1}^{m+k(n)} \frac{C_X(\sqrt{t_j} + t_j) \cdot N}{y_0} \quad \text{by Lemma 3} \\
&\leq \sum_{j=J+1}^{m+k(n)} \frac{C_X(\sqrt{\eta} + \eta) \cdot N}{y_0} \quad \text{due to } j > J, \text{ and hence } t_j \leq \eta = \delta^{m\alpha_3}/n^{\alpha_4} \\
&= N^2 \cdot \frac{C_X(\sqrt{\eta} + \eta)}{y_0} \leq (m+k(n))^2 \cdot \frac{C_X(\sqrt{\eta} + \eta)}{y_0} \quad \text{due to } N \leq m+k(n) \\
&\leq 2C_X(m^2 + (\lceil \log_2(n^d) \rceil)^2) \frac{\sqrt{\eta} + \eta}{y_0} \quad \text{using } (u+v)^2 \leq 2(u^2 + v^2) \\
&\leq 4C_X(m^2 + (\lceil \log_2(n^d) \rceil)^2) \frac{\sqrt{\eta}}{y_0} = 4C_X(m^2 + (\lceil \log_2(n^d) \rceil)^2) \frac{\delta^{m\alpha_3/2}}{y_0 \cdot n^{\alpha_4/2}}.
\end{aligned} \tag{93}$$

Plugging (92) and (93) into (91), we yield

$$\begin{aligned}
&\mathbf{P}\left(\sum_{j=1}^{m+k(n)} (\xi_j^{[n]}(l))^+ \in [y, y+c] \mid \tilde{l}_j = t_j \forall j \in [m+k(n)]\right) \\
&\leq J \cdot \frac{Cn^{\alpha_4\lambda}}{\delta^{m\alpha_3\lambda}} c + 4C_X(m^2 + (\lceil \log_2(n^d) \rceil)^2) \frac{\delta^{m\alpha_3/2}}{y_0 \cdot n^{\alpha_4/2}} \\
&\leq C \frac{(m + (\lceil \log_2(n^d) \rceil)) n^{\alpha_4\lambda}}{\delta^{m\alpha_3\lambda}} c + 4C_X(m^2 + (\lceil \log_2(n^d) \rceil)^2) \frac{m\delta^{\alpha_3/2}}{y_0 \cdot n^{\alpha_4/2}} \quad \text{due to } J \leq m + \lceil \log_2(n^d) \rceil.
\end{aligned}$$

To conclude the proof, just note that the inequality above holds when conditioning on any sequence of  $t_1 \geq t_2 \geq \dots \geq t_{m+k(n)} > 0$ , so it would also hold unconditionally.  $\square$
